# Supplementary material for: Phthalate concentrations in house dust in relation to autism spectrum disorder and developmental delay in the CHildhood Autism Risks from Genetics and the Environment (CHARGE) study
Source: PubMed Central journal article supplement (PMC4507319; doi:10.1186/s12940-015-0024-9), 2015-06-26
Supplement: 12940_2015_24_MOESM1_ESM.pdf [file 12940_2015_24_MOESM1_ESM.pdf]

## SUPPLEMENTAL MATERIAL

### **Phthalate concentrations in house dust in relation to autism spectrum disorder and developmental delay in the CHildhood Autism Risks from Genetics and the Environment (CHARGE) Study.**

Claire Philippat, Deborah Bennett, Paula Krakowiak, Melissa Rose, Hyun-Min Hwang, Irva Hertz-Picciotto

#### **Table of contents**

|                                                                                                                                                                              |   |
|------------------------------------------------------------------------------------------------------------------------------------------------------------------------------|---|
| Table 1: Aberrant Behavior Checklist hyperactivity subscale items used to compute the hyperactivity/impulsivity subdomain and the inattention subdomain .....                | 2 |
| Table 2: MSEL, VABS and ABC scores according to diagnostic groups (CHARGE study, n = 145) .....                                                                              | 3 |
| Table 3: Characteristics of the dust study population and comparison with the whole CHARGE case-control study enrolled before the end of the dust study (2003 – 2011). ..... | 4 |
| Table 4: Phthalate concentrations in house dust ( $\mu\text{g/g}$ of dust, CHARGE study, n = 145).....                                                                       | 5 |
| Table 5: Adjusted associations between dust phthalate concentrations and the MSEL and VABS scores among boys (CHARGE study, n = 115).....                                    | 6 |
| Table 6: Comparison of phthalate concentrations measured in house dust in different studies .....                                                                            | 7 |
| Figure 1: Dust phthalate concentrations ( $\mu\text{g/g}$ ) according to the date of dust collection .....                                                                   | 8 |

Table 1: Aberrant Behavior Checklist hyperactivity subscale items used to compute the hyperactivity/impulsivity subdomain and the inattention subdomain

| <b>Subdomain</b>          | <b>Subscale items used</b>                                                                                                                                                                                                                                                                                                                                                                                                                                                                                                                              |
|---------------------------|---------------------------------------------------------------------------------------------------------------------------------------------------------------------------------------------------------------------------------------------------------------------------------------------------------------------------------------------------------------------------------------------------------------------------------------------------------------------------------------------------------------------------------------------------------|
| Hyperactivity/Impulsivity | Hyperactivity subscale items 1, 7, 13, 15, 21, 31, 38, 39, 48, and 54:<br>1. Excessively active at home, school, work, or elsewhere<br>7. Boisterous (inappropriately noisy and rough)<br>13. Impulsive (acts without thinking)<br>15. Restless, unable to sit still<br>21. Disturbs others<br>31. Disrupts group activities<br>38. Does not stay in seat (e.g., during lesson or training periods, meals, etc.)<br>39. Will not sit still for any length of time<br>48. Constantly jumps or runs around the room<br>54. Tends to be excessively active |
| Inattention               | Hyperactivity subscale items 28,44,51<br>28. Does not pay attention to instructions<br>44. Easily distractible<br>51. Pays no attention when spoken to                                                                                                                                                                                                                                                                                                                                                                                                  |

Table 2: MSEL, VABS and ABC scores according to diagnostic groups (CHARGE study, n = 145)

|                                                              | TD |             |     |     | DD |             |    |     | ASD |             |    |     |
|--------------------------------------------------------------|----|-------------|-----|-----|----|-------------|----|-----|-----|-------------|----|-----|
|                                                              | N  | Percentiles |     |     | N  | Percentiles |    |     | N   | Percentiles |    |     |
|                                                              |    | 5           | 50  | 95  |    | 5           | 50 | 95  |     | 5           | 50 | 95  |
| <b>Vineland Adaptive Behavior Scales (standard scores)</b>   |    |             |     |     |    |             |    |     |     |             |    |     |
| Communication                                                | 68 | 80          | 103 | 126 | 27 | 49          | 67 | 82  | 50  | 52          | 69 | 94  |
| Daily living skills                                          | 68 | 72          | 93  | 117 | 27 | 51          | 64 | 86  | 50  | 54          | 68 | 93  |
| Socialization                                                | 68 | 85          | 104 | 124 | 27 | 55          | 73 | 107 | 50  | 53          | 67 | 88  |
| Motor skills                                                 | 68 | 83          | 107 | 130 | 27 | 49          | 60 | 85  | 50  | 54          | 77 | 107 |
| Adaptive behavior Composite score                            | 68 | 83          | 98  | 127 | 27 | 47          | 61 | 87  | 50  | 53          | 65 | 88  |
| <b>Mullen (DQ scores)</b>                                    |    |             |     |     |    |             |    |     |     |             |    |     |
| Visual Reception                                             | 68 | 88          | 114 | 150 | 27 | 27          | 60 | 103 | 50  | 40          | 70 | 120 |
| Fine Motor                                                   | 68 | 78          | 103 | 127 | 27 | 33          | 58 | 78  | 50  | 43          | 67 | 106 |
| Receptive Language                                           | 68 | 80          | 112 | 142 | 27 | 18          | 56 | 81  | 50  | 25          | 52 | 109 |
| Expressive Language                                          | 68 | 79          | 105 | 139 | 27 | 18          | 52 | 81  | 50  | 23          | 61 | 109 |
| Composite score                                              | 68 | 88          | 112 | 131 | 27 | 26          | 60 | 83  | 50  | 37          | 61 | 102 |
| <b>Aberrant Behavior Checklist (hyperactivity subscales)</b> |    |             |     |     |    |             |    |     |     |             |    |     |
| Hyperactivity / impulsivity                                  | 64 | 0           | 1   | 7   | 22 | 0           | 4  | 20  | 48  | 0           | 7  | 20  |
| Inattention                                                  | 64 | 0           | 0   | 2   | 24 | 0           | 1  | 6   | 49  | 0           | 3  | 6   |

Abbreviation: ASD: autism spectrum disorder, CI: confidence interval, DD: developmental delay, TD: typically developing

Table 3: Characteristics of the dust study population and comparison with the whole CHARGE case-control study enrolled before the end of the dust study (2003 – 2011).

| Characteristics                                                              | CHARGE participant enrolled in the dust study (n = 145) |           | CHARGE participant enrolled until the end of the dust study (n = 1092) |           | P-values <sup>a</sup> |
|------------------------------------------------------------------------------|---------------------------------------------------------|-----------|------------------------------------------------------------------------|-----------|-----------------------|
|                                                                              | N                                                       | %         | N                                                                      | %         |                       |
| <b>Child diagnosis</b>                                                       |                                                         |           |                                                                        |           | 0.001                 |
| TD                                                                           | 68                                                      | 47        | 304                                                                    | 32        |                       |
| DD                                                                           | 27                                                      | 19        | 188                                                                    | 20        |                       |
| ASD                                                                          | 50                                                      | 34        | 455                                                                    | 48        |                       |
| <b>Child gender</b>                                                          |                                                         |           |                                                                        |           | 0.61                  |
| Male                                                                         | 115                                                     | 79        | 768                                                                    | 81        |                       |
| Female                                                                       | 30                                                      | 21        | 179                                                                    | 19        |                       |
| <b>Child race</b>                                                            |                                                         |           |                                                                        |           | 0.09                  |
| White, Non-Hispanic                                                          | 85                                                      | 59        | 461                                                                    | 49        |                       |
| Hispanic (any)                                                               | 40                                                      | 28        | 307                                                                    | 32        |                       |
| other                                                                        | 20                                                      | 14        | 175                                                                    | 18        |                       |
| missing                                                                      | 0                                                       | 0         | 4                                                                      | 0         |                       |
| <b>Maternal education</b>                                                    |                                                         |           |                                                                        |           | 0.002                 |
| High school diploma and lower, < 1 year college, technical vocational school | 21                                                      | 14        | 265                                                                    | 28        |                       |
| > 1 year college, associate degree                                           | 43                                                      | 30        | 285                                                                    | 30        |                       |
| Bachelor degree                                                              | 56                                                      | 38        | 280                                                                    | 30        |                       |
| Graduate school                                                              | 25                                                      | 17        | 116                                                                    | 12        |                       |
| missing                                                                      | 0                                                       | 0         | 1                                                                      | 0         |                       |
| <b>Delivery payer</b>                                                        |                                                         |           |                                                                        |           | 0.02                  |
| Government program / no Insurance                                            | 19                                                      | 13        | 202                                                                    | 21        |                       |
| Private insurance                                                            | 126                                                     | 87        | 743                                                                    | 78        |                       |
| Missing                                                                      | 0                                                       | 0         | 2                                                                      | 0         |                       |
| <b>Own their home</b>                                                        |                                                         |           |                                                                        |           | 0.002                 |
| Yes                                                                          | 111                                                     | 76        | 590                                                                    | 62        |                       |
| No                                                                           | 27                                                      | 19        | 290                                                                    | 31        |                       |
| missing                                                                      | 7                                                       | 5         | 67                                                                     | 7         |                       |
| <b>Regional center catchment area at enrollment</b>                          |                                                         |           |                                                                        |           | 0.03                  |
| Alta, Far Northern, and Redwood Coast                                        | 85                                                      | 59        | 459                                                                    | 48        |                       |
| North Bay                                                                    | 25                                                      | 17        | 143                                                                    | 15        |                       |
| East Bay, San Andreas, and Golden Gate                                       | 15                                                      | 10        | 121                                                                    | 13        |                       |
| Valley Mt, Central Valley, and Kern                                          | 20                                                      | 14        | 224                                                                    | 24        |                       |
|                                                                              | <b>Mean</b>                                             | <b>SD</b> | <b>Mean</b>                                                            | <b>SD</b> |                       |
| <b>Paternal age</b>                                                          | 35                                                      | 6         | 33                                                                     | 7         | <0.001                |
| <b>Maternal age</b>                                                          | 33                                                      | 6         | 30                                                                     | 6         | <0.001                |
| <b>Birth weight</b>                                                          | 3344                                                    | 674       | 3407                                                                   | 687       | 0.25                  |
| <b>Gestational duration</b>                                                  | 39                                                      | 2         | 39                                                                     | 2         | 0.21                  |

<sup>a</sup>Chi-square test for categorical variables and Mann-Whitney test for continuous variables.

Table 4: Phthalate concentrations in house dust ( $\mu\text{g/g}$  of dust, CHARGE study, n = 145)

|                            | % > | Percentiles |      |      |      |      |
|----------------------------|-----|-------------|------|------|------|------|
|                            | LOD | 5           | 25   | 50   | 75   | 95   |
| Dimethyl phthalate         | 63  | < LOD       | <LOD | 0.07 | 0.14 | 0.53 |
| Diethyl phthalate          | 92  | < LOD       | 0.41 | 1.01 | 1.75 | 6.67 |
| Dibutyl phthalate          | 99  | 2.71        | 5.91 | 10.3 | 17.9 | 36.8 |
| Butylbenzyl phthalate      | 99  | 1.07        | 5.24 | 13.4 | 34.1 | 200  |
| Di(2-ethylhexyl) phthalate | 99  | 40.4        | 103  | 187  | 301  | 656  |

Table 5: Adjusted associations between dust phthalate concentrations and the MSEL and VABS scores among boys (CHARGE study, n = 115)

|                                     | Dimethyl phthalate |              | Diethyl phthalate |               | Dibutyl phthalate |               | Butylbenzyl phthalate |              | Di(2-ethylhexyl) phthalate |               |
|-------------------------------------|--------------------|--------------|-------------------|---------------|-------------------|---------------|-----------------------|--------------|----------------------------|---------------|
|                                     | $\beta$            | 95%CI        | $\beta$           | 95%CI         | $\beta$           | 95%CI         | $\beta$               | 95%CI        | $\beta$                    | 95%CI         |
| <b>ASD and DD children (n = 57)</b> |                    |              |                   |               |                   |               |                       |              |                            |               |
| <b>Mullen (DQ scores)</b>           |                    |              |                   |               |                   |               |                       |              |                            |               |
| Composite score                     | -0.89              | [-5.2 ; 3.4] | -0.77             | [-6.1 ; 4.5]  | 1.10              | [-7.0 ; 9.2]  | -1.07                 | [-5.7 ; 3.6] | 2.00                       | [-5.8 ; 9.8]  |
| Expressive language                 | -1.67              | [-6.8 ; 3.5] | 0.80              | [-5.6 ; 7.2]  | 1.20              | [-8.5 ; 10.9] | -0.87                 | [-6.5 ; 4.7] | -0.46                      | [-9.8 ; 8.9]  |
| Fine motor                          | -0.57              | [-4.3 ; 3.1] | -3.08             | [-7.7 ; 1.5]  | -3.02             | [-10.1 ; 4.0] | -1.86                 | [-5.9 ; 2.2] | 1.78                       | [-5.0 ; 8.6]  |
| Receptive language                  | 0.86               | [-4.3 ; 6.1] | 0.68              | [-5.7 ; 7.1]  | 2.48              | [-7.2 ; 12.2] | 0.28                  | [-5.3 ; 5.9] | 3.46                       | [-5.9 ; 12.8] |
| Visual reception                    | -2.17              | [-7.7 ; 3.3] | -1.49             | [-8.4 ; 5.4]  | 3.75              | [-6.7 ; 14.2] | -1.85                 | [-7.9 ; 4.2] | 3.22                       | [-6.9 ; 13.3] |
| <b>Vineland (standard scores)</b>   |                    |              |                   |               |                   |               |                       |              |                            |               |
| Composite score                     | 0.00               | [-2.4 ; 2.4] | -1.49             | [-4.5 ; 1.5]  | -0.78             | [-5.3 ; 3.8]  | -0.19                 | [-2.8 ; 2.5] | -2.34                      | [-6.7 ; 2.0]  |
| Communication                       | -0.87              | [-3.5 ; 1.8] | -1.82             | [-5.1 ; 1.4]  | -1.74             | [-6.7 ; 3.3]  | 0.28                  | [-2.6 ; 3.2] | -2.30                      | [-7.1 ; 2.5]  |
| Composite score                     | 0.00               | [-2.4 ; 2.4] | -1.49             | [-4.5 ; 1.5]  | -0.78             | [-5.3 ; 3.8]  | -0.19                 | [-2.8 ; 2.5] | -2.34                      | [-6.7 ; 2.0]  |
| Daily living skills                 | 1.09               | [-1.0 ; 3.2] | -0.41             | [-3.1 ; 2.3]  | -0.35             | [-4.5 ; 3.8]  | 0.15                  | [-2.2 ; 2.5] | -0.98                      | [-5.0 ; 3.0]  |
| Motor skills                        | 0.69               | [-2.7 ; 4.1] | -0.89             | [-5.2 ; 3.4]  | -1.65             | [-8.2 ; 4.9]  | -1.62                 | [-5.4 ; 2.1] | -3.28                      | [-9.6 ; 3.0]  |
| Socialization                       | -0.48              | [-3.5 ; 2.5] | -1.34             | [-5.1 ; 2.4]  | 0.68              | [-5.0 ; 6.4]  | 0.20                  | [-3.1 ; 3.5] | -0.90                      | [-6.4 ; 4.6]  |
| <b>TD children (n =58)</b>          |                    |              |                   |               |                   |               |                       |              |                            |               |
| <b>Mullen (DQ scores)</b>           |                    |              |                   |               |                   |               |                       |              |                            |               |
| Composite score                     | 0.21               | [-3.2 ; 3.6] | -1.54             | [-5.1 ; 2.0]  | 0.20              | [-3.6 ; 4.0]  | 1.23                  | [-1.6 ; 4.0] | 1.29                       | [-3.1 ; 5.6]  |
| Expressive language                 | -0.57              | [-5.0 ; 3.8] | -1.83             | [-6.7 ; 3.0]  | 0.32              | [-5.0 ; 5.6]  | 1.08                  | [-2.8 ; 5.0] | 0.75                       | [-5.3 ; 6.7]  |
| Fine motor                          | 1.00               | [-2.4 ; 4.4] | 0.78              | [-2.8 ; 4.4]  | 2.10              | [-1.8 ; 6.0]  | 0.09                  | [-2.8 ; 3.0] | 2.31                       | [-2.1 ; 6.7]  |
| Receptive language                  | -0.24              | [-4.6 ; 4.2] | -1.92             | [-6.7 ; 2.8]  | 0.03              | [-5.1 ; 5.2]  | 1.36                  | [-2.4 ; 5.1] | 0.83                       | [-5.0 ; 6.7]  |
| Visual reception                    | 0.65               | [-4.3 ; 5.7] | -3.17             | [-8.3 ; 1.9]  | -1.66             | [-7.2 ; 3.9]  | 2.37                  | [-1.7 ; 6.4] | 1.25                       | [-5.1 ; 7.6]  |
| <b>Vineland (standard scores)</b>   |                    |              |                   |               |                   |               |                       |              |                            |               |
| Composite score                     | 1.28               | [-2.7 ; 5.3] | -4.30             | [-8.1 ; -0.5] | -3.39             | [-7.6 ; 0.8]  | 0.98                  | [-2.1 ; 4.1] | -0.80                      | [-5.7 ; 4.0]  |
| Communication                       | 0.87               | [-2.6 ; 4.3] | -3.66             | [-7.1 ; -0.3] | -4.05             | [-7.7 ; -0.4] | 0.45                  | [-2.4 ; 3.3] | -1.38                      | [-5.7 ; 3.0]  |
| Composite score                     | 1.28               | [-2.7 ; 5.3] | -4.30             | [-8.1 ; -0.5] | -3.39             | [-7.6 ; 0.8]  | 0.98                  | [-2.1 ; 4.1] | -0.80                      | [-5.7 ; 4.0]  |
| Daily living skills                 | 1.13               | [-2.4 ; 4.6] | -3.56             | [-7.2 ; 0.1]  | -3.01             | [-7.0 ; 0.9]  | 0.68                  | [-2.3 ; 3.6] | -1.98                      | [-6.5 ; 2.6]  |
| Motor skills                        | 1.51               | [-2.0 ; 5.0] | -2.15             | [-5.7 ; 1.4]  | -1.46             | [-5.3 ; 2.4]  | 0.98                  | [-1.8 ; 3.8] | 1.08                       | [-3.3 ; 5.5]  |
| Socialization                       | 0.28               | [-3.0 ; 3.6] | -2.90             | [-6.2 ; 0.4]  | -1.15             | [-4.8 ; 2.5]  | 1.21                  | [-1.5 ; 3.9] | 0.38                       | [-3.8 ; 4.5]  |

Analyses adjusted for child age at assessment, child race, maternal education and date of dust collection.

Abbreviation: ASD: autism spectrum disorder, DD: developmental delay, TD: typically developing

Table 6: Comparison of phthalate concentrations measured in house dust in different studies

| <b>Country and year of dust collection</b> | <b>Concentrations measured in dust<br/>(median, ug/g)</b> |            |            |             |             |
|--------------------------------------------|-----------------------------------------------------------|------------|------------|-------------|-------------|
|                                            | <b>DMP</b>                                                | <b>DEP</b> | <b>DBP</b> | <b>BBzP</b> | <b>DEHP</b> |
| USA (CA), 2011-2010 (present study)        | 0.07                                                      | 1          | 10         | 13          | 187         |
| Japan, 2009 and 2010 [1]                   | < LOD                                                     | < LOD      | 16.6       | 2           | 1110        |
| USA (NY), 2007-2008, 2010 [2]              | 0.08                                                      | 2          | 13.1       | 21.1        | 304         |
| China, 2007-2008, 2010 [2]                 | 0.2                                                       | 0.4        | 20.1       | 0.2         | 228         |
| Denmark, 2008 [3]                          | /                                                         | 1.7        | 15         | 3.7         | 210         |
| USA (CA), 2004 [4]                         | /                                                         | /          | /          | /           | 386         |
| Sweden, 2001-2002 [5]                      | /                                                         | 0          | 45         | 135         | 770         |
| Germany, 2000-2001 [6]                     | 1.5                                                       | 6.1        | 47         | 29.7        | 703         |
| USA (MA), 1999-2001 [7]                    | /                                                         | 4.98       | 20.1       | 45.4        | 340         |
| Germany [8]                                | /                                                         | /          | 87.4       | 15.2        | 480         |

Figure 1: Dust phthalate concentrations ( $\mu\text{g/g}$ ) according to the date of dust collection

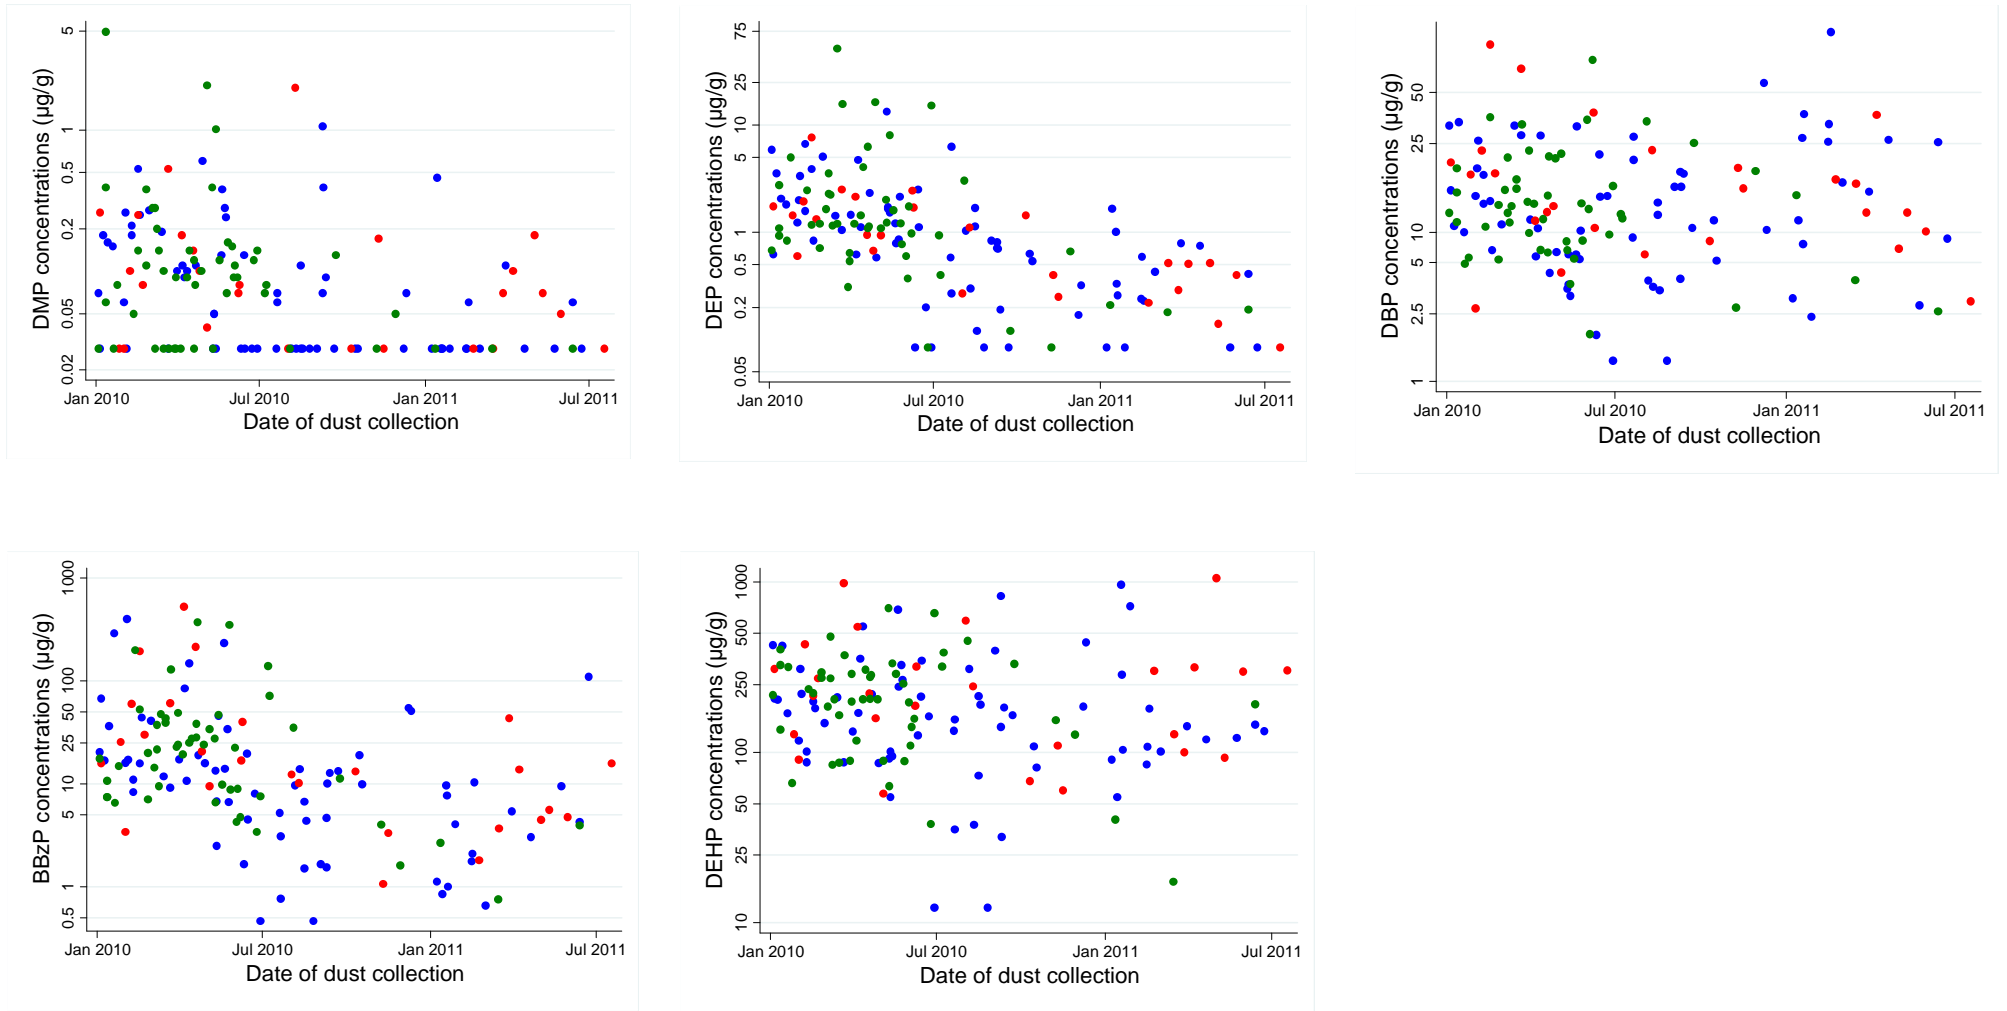

Blue circles represent TD children, red circles DD children and green circles ASD children.

Abbreviations: BBzP: Butylbenzyl phthalate, DBP: Dibutyl phthalate, DEP: Diethyl phthalate, DMP: Dimethyl phthalate, DEHP: Di(2-ethylhexyl) phthalate



## References

1. Ait Bamai Y, Araki A, Kawai T, Tsuboi T, Saito I, Yoshioka E, Kanazawa A, Tajima S, Shi C, Tamakoshi A *et al*: Associations of phthalate concentrations in floor dust and multi-surface dust with the interior materials in Japanese dwellings. *Sci Total Environ* 2014, 468-469:147-157.
2. Guo Y, Kannan K: Comparative assessment of human exposure to phthalate esters from house dust in China and the United States. *Environ Sci Technol* 2011, 45(8):3788-3794.
3. Langer S, Weschler CJ, Fischer A, Bekö G, Toftum J, Clausen G: Phthalate and PAH concentrations in dust collected from Danish homes and daycare centers. *Atmospheric Environment* 2010, 44(19):2294-2301.
4. Hwang HM, Park EK, Young TM, Hammock BD: Occurrence of endocrine-disrupting chemicals in indoor dust. *Sci Total Environ* 2008, 404(1):26-35.
5. Bornehag CG, Lundgren B, Weschler CJ, Sigsgaard T, Hagerhed-Engman L, Sundell J: Phthalates in indoor dust and their association with building characteristics. *Environ Health Perspect* 2005, 113(10):1399-1404.
6. Fromme H, Lahrz T, Piloty M, Gebhart H, Oddoy A, Ruden H: Occurrence of phthalates and musk fragrances in indoor air and dust from apartments and kindergartens in Berlin (Germany). *Indoor Air* 2004, 14(3):188-195.
7. Rudel RA, Camann DE, Spengler JD, Korn LR, Brody JG: Phthalates, alkylphenols, pesticides, polybrominated diphenyl ethers, and other endocrine-disrupting compounds in indoor air and dust. *Environ Sci Technol* 2003, 37(20):4543-4553.
8. Abb M, Heinrich T, Sorkau E, Lorenz W: Phthalates in house dust. *Environ Int* 2009, 35(6):965-970.
